# Supplementary material
Source: publisher figshare collection journal article supplement (https://karger.figshare.com/ndownloader/files/26634011)
Supplement: Supplementary file 1 [file 26634011]

## Supplementary File 4: Data extraction of included studies regarding the after-the-party stage

| Publication                                                                                                                                                                                                                                                                                                                    | Name of intervention                                                      | Year/ Duration of intervention | Country of intervention    | Target group(s)                                                                                                                                                                       | Number of participants                                                                                                                                                                                                                                    | Target substance (alcohol/ drugs) | Setting                                                                                                                                                                                                                                                                                                                       | Outcomes                                                                                                                                                                                                                                                                                                        | Results                                                                                                                                                                                                                                                                                                                                                                                                                                                                                                                                                                                                                                                                                                                                                                                                                                                   | Characteristics of intervention                                                                                                                                                                                                                                  | Reporting STROBE/ AMSTAR (Four-star Rating) |
|--------------------------------------------------------------------------------------------------------------------------------------------------------------------------------------------------------------------------------------------------------------------------------------------------------------------------------|---------------------------------------------------------------------------|--------------------------------|----------------------------|---------------------------------------------------------------------------------------------------------------------------------------------------------------------------------------|-----------------------------------------------------------------------------------------------------------------------------------------------------------------------------------------------------------------------------------------------------------|-----------------------------------|-------------------------------------------------------------------------------------------------------------------------------------------------------------------------------------------------------------------------------------------------------------------------------------------------------------------------------|-----------------------------------------------------------------------------------------------------------------------------------------------------------------------------------------------------------------------------------------------------------------------------------------------------------------|-----------------------------------------------------------------------------------------------------------------------------------------------------------------------------------------------------------------------------------------------------------------------------------------------------------------------------------------------------------------------------------------------------------------------------------------------------------------------------------------------------------------------------------------------------------------------------------------------------------------------------------------------------------------------------------------------------------------------------------------------------------------------------------------------------------------------------------------------------------|------------------------------------------------------------------------------------------------------------------------------------------------------------------------------------------------------------------------------------------------------------------|---------------------------------------------|
| <b>After the party: Individual-centered and environmental interventions:</b>                                                                                                                                                                                                                                                   |                                                                           |                                |                            |                                                                                                                                                                                       |                                                                                                                                                                                                                                                           |                                   |                                                                                                                                                                                                                                                                                                                               |                                                                                                                                                                                                                                                                                                                 |                                                                                                                                                                                                                                                                                                                                                                                                                                                                                                                                                                                                                                                                                                                                                                                                                                                           |                                                                                                                                                                                                                                                                  |                                             |
| <b>Primary studies</b>                                                                                                                                                                                                                                                                                                         |                                                                           |                                |                            |                                                                                                                                                                                       |                                                                                                                                                                                                                                                           |                                   |                                                                                                                                                                                                                                                                                                                               |                                                                                                                                                                                                                                                                                                                 |                                                                                                                                                                                                                                                                                                                                                                                                                                                                                                                                                                                                                                                                                                                                                                                                                                                           |                                                                                                                                                                                                                                                                  |                                             |
| Rivara FP, Boisvert D, Relyea-Chew A, Gomez T. Last Call: decreasing drunk driving among 21-34-year-old bar patrons. Int J Inj Contr Saf Promot. 2012;19(1):53-61. doi:10.1080/17457300.2011.603150.                                                                                                                           | Last Call                                                                 | 2006-2008                      | USA ( Seattle, Washington) | 21-34-year old bar patrons                                                                                                                                                            | <ul style="list-style-type: none"> <li>taxis used at the stands by 25–40 patrons/h</li> <li>paid radio reached 22% of men aged 21–34 years in Seattle</li> <li>84% of men in Seattle aged 21-34 were estimated to be reached by TV commercials</li> </ul> | alcohol                           | <ul style="list-style-type: none"> <li>new taxi stands Thursday– Sat. nights from 11:30 p.m. to 3 a.m</li> <li>Point of sale information (coasters, posters etc)</li> <li>Public education campaign (commercials on TV, radio, transit advertisement, street teams, presence in social media, pup-up ads, webpage)</li> </ul> | <ul style="list-style-type: none"> <li>prevalence of drunk driving</li> <li>use of designated drivers or safe ride home programs</li> <li>motor vehicle crashes</li> </ul>                                                                                                                                      | <ul style="list-style-type: none"> <li>no overall effect on self-reported driving after drinking , serving as a designated driver or use of taxis after drinking in bars</li> <li>among those at greatest risk of crash significant increase in use of designated drivers (+48%) and use of taxis (+63%)</li> <li>nighttime motor vehicle crashes in the target age group decreased</li> </ul>                                                                                                                                                                                                                                                                                                                                                                                                                                                            | Multifaceted social marketing campaign. Formative research consisting of a telephone survey, focus groups with the priority population and bar owners to shape the intervention. Results compared to two control communities (1 in-state, 1 out-of-state).       | 22/22 (***)                                 |
| Scott N, Hart A, Wilson J, Livingston M, Moore D, Dietze P. The effects of extended public transport operating hours and venue lockout policies on drinking-related harms in Melbourne, Australia: Results from SimDrink, an agent-based simulation model. Int J Drug Policy. 2016;32:44-49. doi:10.1016/j.drugpo.2016.02.016. | Extended public transport (PT) operating hours and venue lockout policies | 2015?                          | Australia (Melbourne)      | 18–25 year old heavy drinkers, outer-urban (OU) and inner-city (IC) residents who move between private, public-niche (e.g. pubs, bars) and public-commercial (e.g. nightclubs) venues | No data                                                                                                                                                                                                                                                   | alcohol                           | Agent-based model (ABM) SimDrink                                                                                                                                                                                                                                                                                              | <ul style="list-style-type: none"> <li>number of incidents of verbal aggression inside venues;</li> <li>number of people ejected from public venues for being intoxicated</li> <li>prevalence of experiencing verbal aggression</li> <li>consumption-related harms</li> <li>transport-related harms.</li> </ul> | <p>24-hour PT:</p> <ul style="list-style-type: none"> <li>21% decrease in prevalence of experiencing verbal aggression</li> <li>1 am lockouts: <ul style="list-style-type: none"> <li>reduced prevalence of experiencing verbal aggression</li> <li>increases prevalence of consumption-related harms</li> <li>reduced transport-related harms by more than a third (35%)</li> </ul> </li> <li>24-hour PT AND 1 am lockouts <ul style="list-style-type: none"> <li>reduced prevalence of experiencing verbal aggression by 25%</li> <li>increased consumption- related harms</li> </ul> </li> </ul> <p>Results similar for a two-hour extension of PT. 3 am lockouts less than half as effective as 1 am venue lockouts. However, when implemented in conjunction with any extension of PT, 3 am lockouts were equally as effective as 1 am lockouts.</p> | agent-based simulation model                                                                                                                                                                                                                                     | 22/22 (**)                                  |
| Scagnolari S, Walker J, Maggi R. Young drivers’ night-time mobility preferences and attitude toward alcohol consumption: A Hybrid Choice Model. Accid Anal Prev. 2015;83:74-89. doi:10.1016/j.aap.2015.07.002.                                                                                                                 | Mobility preferences during night hours                                   | 2011                           | CH (Lugano)                | university students from different faculties and secondary and upper-secondary schools (aged 14–25 years (mean 20.1, SD 3.07)                                                         | 316                                                                                                                                                                                                                                                       | nighttime-mobility/ alcohol       | paper-based questionnaire                                                                                                                                                                                                                                                                                                     | young drivers’ preferences for different transport alternatives during night hours                                                                                                                                                                                                                              | <ul style="list-style-type: none"> <li>young drivers are willing to choose public alternatives (i.e. shared taxis, mini bus)</li> <li>countermeasures (i.e. police controls, license suspension) can increase willingness</li> <li>people with a higher attitude to alcohol are more willing to switch to new public transport alternatives</li> </ul> <p>Conclusion:<br/>Need of combined strategy (rise public awareness, appropriate</p>                                                                                                                                                                                                                                                                                                                                                                                                               | Stated Preferences (SP) experiment to collect mobility preferences at nighttime considering individual characteristics (age, gender, experience), specific circumstances (weekend, night hours), psychological factors (i.e. peer group pressure, lifestyle) and | 18/22 (**)                                  |

|                                                                                                                                                      |                         |                                |                               |                                               |                                                                                                                                                                                                                                   |                                                                                                                                          |                                               |                                                                                                                                                                                                                                                                                                                                                     | legislation, appropriate public transport) | countermeasures that policymakers apply.                                                                                                              |                                                                                                                                                                                                                                                                                                                                                                                                                                                                                                                                                                                                                                                                                                                                                                                                                                                                                                                                                                     |
|------------------------------------------------------------------------------------------------------------------------------------------------------|-------------------------|--------------------------------|-------------------------------|-----------------------------------------------|-----------------------------------------------------------------------------------------------------------------------------------------------------------------------------------------------------------------------------------|------------------------------------------------------------------------------------------------------------------------------------------|-----------------------------------------------|-----------------------------------------------------------------------------------------------------------------------------------------------------------------------------------------------------------------------------------------------------------------------------------------------------------------------------------------------------|--------------------------------------------|-------------------------------------------------------------------------------------------------------------------------------------------------------|---------------------------------------------------------------------------------------------------------------------------------------------------------------------------------------------------------------------------------------------------------------------------------------------------------------------------------------------------------------------------------------------------------------------------------------------------------------------------------------------------------------------------------------------------------------------------------------------------------------------------------------------------------------------------------------------------------------------------------------------------------------------------------------------------------------------------------------------------------------------------------------------------------------------------------------------------------------------|
| Sponsorship/ coordination of Intervention                                                                                                            | Intervention title      | Year/ Duration of intervention | Country of intervention       | Target group(s) of i                          | Number of participants                                                                                                                                                                                                            | Target                                                                                                                                   | Setting                                       | Characteristics of intervention                                                                                                                                                                                                                                                                                                                     | Costs                                      | Evaluation data                                                                                                                                       | References                                                                                                                                                                                                                                                                                                                                                                                                                                                                                                                                                                                                                                                                                                                                                                                                                                                                                                                                                          |
| <b>Grey Literature</b>                                                                                                                               |                         |                                |                               |                                               |                                                                                                                                                                                                                                   |                                                                                                                                          |                                               |                                                                                                                                                                                                                                                                                                                                                     |                                            |                                                                                                                                                       |                                                                                                                                                                                                                                                                                                                                                                                                                                                                                                                                                                                                                                                                                                                                                                                                                                                                                                                                                                     |
| Camden council, Camden Police and NHS Camden                                                                                                         | Camden Departure Lounge | since 2010                     | GB (Camden Town Area, London) | Users of nighttime economy                    | approx. 200 users/week                                                                                                                                                                                                            | Reduce toll of alcohol- related injuries, enhance street safety                                                                          | Chill-out Lounge at traffic junction          | Chill-out lounge at traffic junction, open Friday and Saturday evenings 8:30pm-4:30 am. Offers travel advice on bus routes and taxi companies, hands out maps and can tend to a small number of people under the influence of alcohol until they are well enough to make their way home. Hands out flip-flops, condoms, blankets, drinks, biscuits. | <1000 £/weekend                            | No data available                                                                                                                                     | 1. Tackling alcohol problems in the night time economy: guidance for local areas. 2012;(July):17. <a href="http://www.ias.org.uk/uploads/pdf/News_stories/gla-guidance-alcohol.pdf">http://www.ias.org.uk/uploads/pdf/News_stories/gla-guidance-alcohol.pdf</a> .<br>2. Camden Town. Social Care and Health Camden- Alcohol. <a href="https://www.camden.gov.uk/ccm/content/social-care-and-health/health-in-camden/joint-strategic-needs-assessment-2012/chapter-12-alcohol/?page=6">https://www.camden.gov.uk/ccm/content/social-care-and-health/health-in-camden/joint-strategic-needs-assessment-2012/chapter-12-alcohol/?page=6</a> . Accessed February 2, 2017.<br>3. Camden New Journal. FLIP-FLOPS FOR DRUNK REVELLERS IN CAMDEN TOWN. <a href="http://www.camdennewjournal.com/news/2010/oct/flip-flops-drunk-revellers-camden-town">http://www.camdennewjournal.com/news/2010/oct/flip-flops-drunk-revellers-camden-town</a> . Accessed February 2, 2017. |
| Volunteer centered charity organization based on Christian believes                                                                                  | SOS Bus                 | since 2007                     | Ireland (Belfast)             | Users of nighttime economy, vulnerable groups | Since starting in November 2007, SOS Bus NI has engaged with almost 283,000 people on the streets of Belfast, provided in-depth professional medical and caring services to over 7,500 and has been proven to have saved 25 lives | Reduce toll of alcohol- related injuries, enhance street safety, professional caring services for vulnerable groups in times of crisis   | High Risk areas in Belfast                    | Trained volunteers and medical staff operate from specially designed and equipped vehicles deploying satellite foot and mobile patrols to extended areas of need on Friday and Saturday evenings 11pm-3 am. Works with other voluntary organizations, the emergency services and statutory bodies                                                   | approx. 280 000 £/year                     | No data available                                                                                                                                     | 1. Tackling alcohol problems in the night time economy: guidance for local areas. 2012;(July):17. <a href="http://www.ias.org.uk/uploads/pdf/News_stories/gla-guidance-alcohol.pdf">http://www.ias.org.uk/uploads/pdf/News_stories/gla-guidance-alcohol.pdf</a> .<br><br><a href="http://www.sosbusni.com/">http://www.sosbusni.com/</a>                                                                                                                                                                                                                                                                                                                                                                                                                                                                                                                                                                                                                            |
| Public Carriage Office (PCO), Metropolitan Police Service, Westminster City Council and London Cab Ranks Committee, as well as private organizations | Taxi Marshals           | since 2004                     | GB (London)                   | Users of nighttime economy, taxi drivers      | No data                                                                                                                                                                                                                           | reducing crime and disorder in public areas as well as making sure general public get home safe at night, enhance safety of taxi drivers | high frequented taxi ranks in the early hours | Taxi marshals offer reassuring presence to passengers and coordinate taxi travellers with taxi drivers heading to similar destinations. Sometimes in presence of police officers . Works with emergency services and statutory bodies                                                                                                               | No data available                          | Evaluation 2010: Questionnaire by City of London's safer city Partnership: Of 371 respondents, 360 already used the service and considered it helpful | 1. Tackling alcohol problems in the night time economy: guidance for local areas. 2012;(July):17. <a href="http://www.ias.org.uk/uploads/pdf/News_stories/gla-guidance-alcohol.pdf">http://www.ias.org.uk/uploads/pdf/News_stories/gla-guidance-alcohol.pdf</a> .<br><br><a href="http://www.taximarshals.com/">http://www.taximarshals.com/</a>                                                                                                                                                                                                                                                                                                                                                                                                                                                                                                                                                                                                                    |

| Sponsorship/<br>coordination of<br>intervention                                                        | Interven-<br>tion title             | Year/<br>Duration of<br>intervention | Country of<br>intervention | Target<br>group(s)                            | Number of<br>participants                                                                                                                                                                          | Target                                                                                                                    | Setting                                                                     | Characteristics of<br>intervention                                                                                                                                                                 | Costs             | Evaluation data                                                                                                                                                                                                  | References                                                                                                                                                                                                                                                                                                                                                                                                                                                                                                                                                                                                                                                                                                                                                                                                                                                                                                                                                                                                                                                                                                 |
|--------------------------------------------------------------------------------------------------------|-------------------------------------|--------------------------------------|----------------------------|-----------------------------------------------|----------------------------------------------------------------------------------------------------------------------------------------------------------------------------------------------------|---------------------------------------------------------------------------------------------------------------------------|-----------------------------------------------------------------------------|----------------------------------------------------------------------------------------------------------------------------------------------------------------------------------------------------|-------------------|------------------------------------------------------------------------------------------------------------------------------------------------------------------------------------------------------------------|------------------------------------------------------------------------------------------------------------------------------------------------------------------------------------------------------------------------------------------------------------------------------------------------------------------------------------------------------------------------------------------------------------------------------------------------------------------------------------------------------------------------------------------------------------------------------------------------------------------------------------------------------------------------------------------------------------------------------------------------------------------------------------------------------------------------------------------------------------------------------------------------------------------------------------------------------------------------------------------------------------------------------------------------------------------------------------------------------------|
| <b>After the party: Grey Literature</b>                                                                |                                     |                                      |                            |                                               |                                                                                                                                                                                                    |                                                                                                                           |                                                                             |                                                                                                                                                                                                    |                   |                                                                                                                                                                                                                  |                                                                                                                                                                                                                                                                                                                                                                                                                                                                                                                                                                                                                                                                                                                                                                                                                                                                                                                                                                                                                                                                                                            |
| Ascension Trust                                                                                        | Street Pastors                      | since 2003                           | GB (75 cities)             | Users of nighttime economy, vulnerable groups | No data                                                                                                                                                                                            | Reduce toll of alcohol- related injuries, enhance street safety, caring services for vulnerable groups in times of crisis | High Risk areas                                                             | Street patrols on Friday and Saturday evenings 10pm-4 am. Offer travel advice moral support, hand out maps condoms, blankets, drinks, biscuits. Works with emergency services and statutory bodies | No data available | No data available                                                                                                                                                                                                | <a href="http://www.streetpastors.org/">http://www.streetpastors.org/</a>                                                                                                                                                                                                                                                                                                                                                                                                                                                                                                                                                                                                                                                                                                                                                                                                                                                                                                                                                                                                                                  |
| Association Noctambus (Association of local communities)                                               | Noctambus                           | since 2005                           | CH (Geneva)                | Users of nighttime economy                    | No data                                                                                                                                                                                            | Enhance road safety offering extended night time public transport                                                         | Region of Geneva                                                            | Night time public transportation (bus) Friday and Saturday night                                                                                                                                   | No data available | No data available                                                                                                                                                                                                | <a href="http://noctambus.ch/a-propos/">http://noctambus.ch/a-propos/</a>                                                                                                                                                                                                                                                                                                                                                                                                                                                                                                                                                                                                                                                                                                                                                                                                                                                                                                                                                                                                                                  |
| Fondation vaudoise contre l'alcoolisme (FVA), Fachstelle "Alkohol am Steuer , nie" (ASN), Blaues Kreuz | Be my angel                         | since 2002                           | CH (several Cantons)       | Users of nighttime economy aged 18-30 years   | 2015: French-speaking Switzerland 281 events, 7000 signed contracts<br>German-speaking Switzerland 68 events, 7400 signed contracts<br>Italy-speaking Switzerland: 16 events, 192 signed contracts | Enhance road safety by designated drivers                                                                                 | Present in Clubs/bars/Festivals, Social media, website, web application/app | information desk at party events to promote idea of designated drivers. "Contract" with designated drivers: Designated drivers promise to stay sober in exchange for discounted soft drinks.       | No data available | Next day feedback of designated drivers (online link) positive: 80% accomplished the contract. External audit 2016 by Department of Psychology, University of Freiburg, Switzerland with very positive feedback. | 1. Groupement Romande. Prévention en milieu festif. Zoom à Propos Toxicom en région lausannoise. 2009;32(20):5.<br><a href="https://www.radix.ch/files/83RZJJQ/resume_enquete_organisateurs_valide_17609.pdf">https://www.radix.ch/files/83RZJJQ/resume_enquete_organisateurs_valide_17609.pdf</a> .<br>2. Bücheli A. Schadensminderung im Schweizer Nachtleben. SuchtMagazin. 2014;16<br>3. Drogenprävention and Partys. laut leise. 2004;(3). <a href="http://www.suchtprevention-n-zh.ch/fileadmin/user_upload/magazin_laut_leise/pdf/lautleise2004_3.pdf">http://www.suchtprevention-n-zh.ch/fileadmin/user_upload/magazin_laut_leise/pdf/lautleise2004_3.pdf</a> .<br>4. Bourlout C. « Be My Angel Tonight » Präsentation Münster.; 2016.<br>5. FVA. Be My Angel – Montreux Jazz Analyse de Sondage.; 2015.<br>6. Fachstelle ASN. Be My Angel Tonight- Umfrageresultate 2016.; 2016.<br>7. Zentrum für Testentwicklung und Diagnostik Universität Freiburg CH. Be My Angel Tonight - Audit.; 2016.<br><br><a href="http://www.bemyangeltonight.ch/de/home">http://www.bemyangeltonight.ch/de/home</a> |
| Addiction valais in cooperation with local police forces (based on Fiesta Label)                       | Fiesta Drive (Part of Fiesta Label) | No date available                    | CH (Canton of Valais)      | Recreational alcohol and drug users           | No data available                                                                                                                                                                                  | Enhance road safety                                                                                                       | Web application/App                                                         | To connect sober drivers and consumers in need for transport. Drivers receive vouchers, participate in lottery.                                                                                    | No data available | No data available                                                                                                                                                                                                | <a href="http://www.fiesta-drive.ch/">http://www.fiesta-drive.ch/</a>                                                                                                                                                                                                                                                                                                                                                                                                                                                                                                                                                                                                                                                                                                                                                                                                                                                                                                                                                                                                                                      |
